# Supplementary material for: Advances in cranberry insect pest management: A literature synthesis
Source: Frontiers journal article supplement (doi:10.3389/fagro.2023.1006106), 2023-03-06
Supplement: Table_1.XLSX [file Table_1.XLSX]

## Sheet: Sheet1
Authors	Title	Year	Publisher	DOI	Database
Roland, J	Use Of Alternative Plant-Species As A Monitoring Tool For The Cranberry Girdler (Lepidoptera, Pyralidae)	1990	Environmental Entomology	10.1093/ee/19.3.721	Web Of Science
Fitzpatrick, SM, and Troubridge, JT	Relative Efficacies Of 2 Commercial Pheromone Blends For Monitoring The Blackheaded Fireworm (Lepidoptera, Tortricidae) Of Cranberries	1992	Journal Of Economic Entomology	10.1093/jee/85.3.947	Web Of Science
Cockfield, SD, and Mahr, DL	Flooding Cranberry Beds To Control Blackheaded Fireworm (Lepidoptera, Tortricidae)	1992	Journal Of Economic Entomology	10.1093/jee/85.6.2383	Web Of Science
Li, SY; Sirois, GM; (...); Henderson, DE	Indigenous Trichogramma (Hym, Trichogrammatidae) Parasitizing Eggs Of Rhopobota-Naevana (Lep, Tortricidae) On Cranberries In British-Columbia	1993	Entomophaga	10.1007/BF02374447	Web Of Science
Cockfield, SD; Fitzpatrick, SM; (...); Mahr, DL	Modeling Of Blackheaded Fireworm (Lepidoptera, Tortricidae) Oviposition And Pheromone-Trap Catches	1994	Journal Of Economic Entomology	10.1093/jee/87.3.787	Web Of Science
Cockfield, SD; Butkewich, SL; (...); Mahr, DL	Forecasting Flight Activity Of Sparganothis-Sulfureana (Lepidoptera, Tortricidae) In Cranberries	1994	Journal Of Economic Entomology	10.1093/jee/87.1.193	Web Of Science
Cockfield, SD, and Mahr, DL	Prediction Models For Flight Activity Of The Cranberry Girdler (Lepidoptera, Pyralidae) In Wisconsin	1994	Great Lakes Entomologist	https://scholar.valpo.edu/tgle/vol27/iss2/6/	Web Of Science
Cockfield, Sd; Fitzpatrick, Sm; (...); Mahr, Dl	Hatch Of Blackheaded Fireworm (Lepidoptera, Tortricidae) Eggs And Prediction With Temperature-Driven Models	1994	Environmental Entomology	10.1093/ee/23.1.101	Web Of Science
Clark, Jm; Tessier, Dm , and Marion, Jr	Mitigation Of Airborne Parathion Residues From Treated Cranberry Bog Environments Bordering Suburban Areas By A Spray Adjuvant	1994	Journal Of Environmental Science And Health Part A-Environmental Science And Engineering & Toxic And Hazardous Substance Control	10.1080/10934529409376030	Web Of Science
Wan, Mt; Szeto, Sy , and Price, P	Wetlands And Aquatic Processes - Distribution And Persistence Of Azinphos-Methyl And Parathion In Chemigated Cranberry Bogs	1995	Journal Of Environmental Quality	10.2134/jeq1995.00472425002400040006x	Web Of Science
Theilmann Et Al,	Identification Of A Granulosis Virus Associated With Mortality In The Blackheaded Fireworm, Rhopobota Naevana (Hubner) (Lepidoptera: Torticidae) [1995]	1995	Journal Of Invertebrate Pathology	https://agris.fao.org/agris-search/search.do?recordID=US9563015
Simser, D	Parasitism Of Cranberry Fruitworm (Acrobasis-Vaccinii, Lepidoptera, Pyralidae) By Endemic Or Released Trichogramma-Pretiosum (Hymenoptera, Trichogrammatidae)	1995	Great Lakes Entomologist	https://scholar.valpo.edu/cgi/viewcontent.cgi?article=1860&context=tgle&httpsredir=1&referer=	Web Of Science
Fitzpatrick, Sm; Troubridge, Jt; (...); White, J	Initial Studies Of Mating Disruption Of The Blackheaded Fireworm Of Cranberries (Lepidoptera, Tortricidae)	1995	Journal Of Economic Entomology	10.1093/jee/88.4.1017	Web Of Science
Bardwell, Cj , and Averill, Al	Effectiveness Of Larval Defenses Against Spider Predation In Cranberry Ecosystems	1996	Environmental Entomology	10.1093/ee/25.5.1083	Web Of Science
S. Polavarapu	Evaluation Of Insecticides Against Lepidopterous Pests In Cranberries, 1995	1996	Arthropod Management Tests	10.1093/amt/21.1.62a	Arthropod Management Tests
S. Polavarapu, D. E. Schiffhauer	Evaluation Of Insecticides Against Cranberry Rootworm, 1995	1996	Arthropod Management Tests	10.1093/amt/21.1.63	Arthropod Management Tests
Sandler, Ha , and Mason, J	Evaluation Of Three Bioinsecticides For Control Of Lepidopteran Pests In Cranberries	1997	Sixth International Symposium On Vaccinium Culture	10.17660/ActaHortic.1997.446.65	Web Of Science
Averill, Sylvia, Kusek, Demoranville	Flooding In Cranberry To Minimize Insecticide And Fungicide Input	1997	American Journal Of Alternative Agriculture	10.1017/S0889189300007220
Haase-Statz, S	Evaluation Of Paederus Littorarius (Coleoptera : Staphylinidae) As An Egg Predator Of Chrysoteuchia Topiaria (Lepidoptera : Pyralidae) In Wisconsin Cranberry Bogs	1997	Great Lakes Entomologist	https://scholar.valpo.edu/tgle/vol30/iss2/5/	Web Of Science
S. Polavarapu, H. Peng, R.J. Stuart	Residual Toxicity Of Aerially Applied Rh-5992 To Spotted Fireworm And Sparganothis Fruitworm In Cranberries, 1996	1997	Arthropod Management Tests	10.1093/amt/22.1.53a	Arthropod Management Tests
Donald C. Weber, Robert Skinner, Ocean Spray Cranberries	Low-Risk Miticides For Control Of Southern Red Mite On Cranberry, 1996	1997	Arthropod Management Tests	10.1093/amt/22.1.54	Arthropod Management Tests
Baker, Dittl, Mafra-Neto	Disruption Of Sex Pheromone Communication In The Blackheaded Fireworm In Wisconsin Cranberry Marshes By Using Mstrs Devices	1997	J Agric. Entomol	https://ento.psu.edu/files/108bakeretal1997.pdf
Mcgregor, R , and Henderson, D	The Influence Of Oviposition Experience On Response To Host Pheromone In Trichogramma Sibericum (Hymenoptera : Trichogrammatidae)	1998	Journal Of Insect Behavior	10.1023/A:1022390608064	Web Of Science
Polavarapu, S , and Lonergan, G	Sex Pheromone Of Choristoneura Parallela (Lepidoptera : Tortricidae): Components And Development Of A Pheromone Lure For Population Monitoring	1998	Environmental Entomology	10.1093/ee/27.5.1242	Web Of Science
Booth, Sr , and Shanks, Ch	Potential Of A Dried Rice/Mycelium Formulation Of Entomopathogenic Fungi To Suppress Subterranean Pests In Small Fruits	1998	Biocontrol Science And Technology	10.1080/09583159830261	Web Of Science
Stuart, Rj , and Polavarapu, S	Oviposition Preferences Of The Polyphagous Moth Choristoneura Parallela (Lepidoptera : Tortricidae): Effects Of Plant Species, Leaf Size, And Experimental Design	1998	Environmental Entomology	10.1093/ee/27.1.102	Web Of Science
Fadamiro, Cosse, Dittl, Baker	Suppression Of Mating By Blackheaded Fireworm (Lepidoptera: Tortricidae) In Wisconsin Cranberry Marshes By Using Mstrs Devices	1998	J. Agric. Entomol	https://ento.psu.edu/files/115fadamiroetal1998.pdf
S. Polavarapu, H. Peng	Evaluation Of Insecticides Against Blackheaded Fireworm In Cranberries, 1997	1998	Arthropod Management Tests	10.1093/amt/23.1.53	Arthropod Management Tests
Hayes, Ae; Fitzpatrick, Sm , and Webster, Jm	Infectivity, Distribution, And Persistence Of The Entomopathogenic Nematode Steinernema Carpocapsae All Strain (Rhabditida : Steinernematidae) Applied By Sprinklers Or Boom Sprayer To Dry-Pick Cranberries	1999	Journal Of Economic Entomology	10.1093/jee/92.3.539	Web Of Science
Donald C. Weber, Scott R. Roskelley, Monika S. Weldon	Neem Oil For Control Of Southern Red Mite In Cranberries, 1997	1999	Arthropod Management Tests	10.1093/amt/24.1.C13	Arthropod Management Tests
Scott R. Roskelley, Donald C. Weber	Southern Red Mite Control With Pyramite In Cranberry, 1998	1999	Arthropod Management Tests	10.1093/amt/24.1.C11	Arthropod Management Tests
Scott R. Roskelley, Donald C. Weber	Southern Red Mite Control With Various Miticides In Cranberry, 1998	1999	Arthropod Management Tests	10.1093/amt/24.1.C12	Arthropod Management Tests
Donald C. Weber, Scott R. Roskelley, Monika S. Weldon	Pyridaben And Breakthru For Control Of Southern Red Mite In Cranberry, 1997	1999	Arthropod Management Tests	10.1093/amt/24.1.C14	Arthropod Management Tests
Davenport, Jr , and Schiffhauer, De	Cultivar Influences Cranberry Response To Surface Sanding	2000	Hortscience	10.21273/HORTSCI.35.1.53	Web Of Science
Stuart, Rj , and Polavarapu, S	Egg-Mass Variability And Differential Parasitism Of Choristoneura Parallela (Lepidoptera : Tortricidae) By Endemic Trichogramma Minutum (Hymenoptera : Trichogrammatidae)	2000	Annals Of The Entomological Society Of America	10.1603/0013-8746(2000)093[1076:EMVADP]2.0.CO;2	Web Of Science
Booth, Sr; Tanigoshi, L , and Dewes, I	Potential Of A Dried Mycelium Formulation Of An Indigenous Strain Of Metarhizium Anisopliae Against Subterranean Pests Of Cranberry	2000	Biocontrol Science And Technology	10.1080/095831500750016451	Web Of Science
Fitzpatrick, Sm , and Troubridge, Jt	Ochropleura Implecta (Lepidoptera : Noctuidae), A. New Cutworm Pest Of Cranberries	2000	Canadian Entomologist	10.4039/Ent132365-3	Web Of Science
S. Polavarapu	Evaluation Of Insecticides Against Blackheaded Fireworm During Bloom In Cranberries, 1999	2000	Arthropod Management Tests	10.1093/amt/25.1.C10	Arthropod Management Tests
S. Polavarapu, R. J. Stuart, D. E. Schiffhauer	Evaluation Of Insecticides Against Cranberry Rootworm, 1998	2000	Arthropod Management Tests	10.1093/amt/25.1.C9	Arthropod Management Tests
Karen L. Ahola, Donald C. Weber, Scott R. Roskelley	Laboratory Bioassay For Flea Beetle Control On Cranberry, 1999	2000	Arthropod Management Tests	10.1093/amt/25.1.L4	Arthropod Management Tests
Scott R. Roskelley, Bonnie Soule, Karen Ahola, Donald C. Weber	Laboratory Bioassay Of Thiamethoxam, Spinosad And Chlorpyrifos Against Overwintered Cranberry Weevil, 1999	2000	Arthropod Management Tests	10.1093/amt/25.1.L5	Arthropod Management Tests
Scott R. Roskelley, Bonnie Soule, Karen E. Asmussen, Karen Ahola, Donald C. Weber	Control Of Fruitworms On Cranberry, 1999	2000	Arthropod Management Tests	10.1093/amt/25.1.C11	Arthropod Management Tests
Scott R. Roskelley, Donald C. Weber, Karen Ahola, Karen E. Asmussen	Control Of Second Generation Cranberry Weevil With Thiamethoxam, 1999	2000	Arthropod Management Tests	10.1093/amt/25.1.C12	Arthropod Management Tests
Donald C. Weber, Scott R. Roskelley, Karen Ahola, Karen E. Asmussen	Large Plot Field Trial Of Thiamethoxam And Imidacloprid Against First Generation Cranberry Weevil, 1999	2000	Arthropod Management Tests	10.1093/amt/25.1.C13	Arthropod Management Tests
Karen L. Ahola, Donald C. Weber, Scott R. Roskelley	Control Of Flea Beetle In Cranberry With Thiamethoxam, 1999	2000	Arthropod Management Tests	10.1093/amt/25.1.C8	Arthropod Management Tests
Polavarapu, S , and Lonergan, G, Peng, Neilsen	Potential For Mating Disruption Of Sparganothis Sulfureana (Lepidoptera: Tortricidae) In Cranberries	2001	Journal Of Economic Entomology	10.1603/0022-0493-94.3.658
Dixon, Pl , and Hillier, Nk	Insect Pests Of Wild Cranberry, Vaccinium Macrocarpon, In Newfoundland And Labrador	2002	Phytoprotection	10.7202/706237ar	Web Of Science
Brody, Jg; Vorhees, Dj; (...); Rudel, Ra	Using Gis And Historical Records To Reconstruct Residential Exposure To Large-Scale Pesticide Application	2002	Journal Of Exposure Analysis And Environmental Epidemiology	10.1038/sj.jea.7500205	Web Of Science
Donald C. Weber, Scott R. Roskelley	Cranberry Weevil Control In Massachusetts Cranberry, 2000	2002	Arthropod Management Tests	10.1093/amt/27.1.C11	Arthropod Management Tests
Donald C. Weber	Cranberry Fruitworm Control In Massachusetts Cranberry, 2001	2002	Arthropod Management Tests	10.1093/amt/27.1.C10	Arthropod Management Tests
Zhang, Aj , and Polavarapu, S	Sex Pheromone Of The Cranberry Blossom Worm, Epiglaea Apiata	2003	Journal Of Chemical Ecology	10.1023/A:1025646804797	Web Of Science
Zhang, Aj; Robbins, Ps; (...); Villani, Mg	Identification Of The Female-Produced Sex Pheromone Of The Scarab Beetle, Hoplia Equina	2003	Journal Of Chemical Ecology	10.1023/A:1024226931240	Web Of Science
Putnam, Ra; Nelson, Jo , and Clark, Jm	The Persistence And Degradation Of Chlorothalonil And Chlorpyrifos In A Cranberry Bog	2003	Journal Of Agricultural And Food Chemistry	10.1021/jf020744r	Web Of Science
Long, Bb , and Averill, Al	Compensatory Response Of Cranberry To Simulated Damage By Cranberry Weevil (Anthonomus Musculus Say) (Coleoptera : Curculionidae)	2003	Journal Of Economic Entomology	10.1603/0022-0493-96.2.407	Web Of Science
Marchand, D , and Mcneil, Jn	Avoidance Of Intraspecific Competition Via Host Modification In A Grazing, Fruit-Eating Insect	2004	Animal Behaviour	10.1016/j.anbehav.2003.03.017	Web Of Science
Marchand, D , and Mcneil, Jn	The Importance Of Behavioral Plasticity For Maximizing Foraging Efficiency In Frugivorous Lepidopteran Larvae	2004	Journal Of Insect Behavior	10.1023/B:JOIR.0000042548.24435.d0	Web Of Science
Weber, Dc; Robbins, Ps , and Averill, Al	Hoplia Equina (Coleoptera : Searabaeidae) And Nontarget Capture Using 2-Tetradecanone-Baited Traps	2005	Environmental Entomology	10.1603/0046-225X-34.1.158	Web Of Science
Demoranville, Cj; Sandler, Ha; (...); Pober, Dm	Fall Flooding For Management Of Cranberry Fruitworm (Acrobasis Vaccinii) And Dewberry (Rubus Hispidus) In Massachusetts Cranberry Production	2005	Crop Protection	10.1016/j.cropro.2005.01.024	Web Of Science
Sridhar Polavarapu, James D. Barry, Elizabeth Bender	Spotted Fireworm Control, 2002	2005	Arthropod Management Tests	10.1093/amt/30.1.C15	Arthropod Management Tests
Sridhar Polavarapu, James D. Barry, Elizabeth Bender	Spotted Fireworm Control, 2002	2005	Arthropod Management Tests	10.1093/amt/30.1.C16	Arthropod Management Tests
Dan Schiffhauer, Sridhar Polavarapu, Robert Holdcraft, James D. Barry	Blunt-Nosed Leafhopper Control, 2003	2005	Arthropod Management Tests	10.1093/amt/30.1.C17	Arthropod Management Tests
Teixeira, Laf , and Averill, Al	Evaluation Of Flooding For Cultural Control Of Sparganothis Sulfureana (Lepidoptera : Tortricidae) In Cranberry Bogs	2006	Environmental Entomology	10.1603/0046-225X-35.3.670	Web Of Science
Miller, Sa; Patel, N , and Stanley, Cj	Cranberry Pests And Diseases In New Zealand	2006	Proceedings Of The 8Th International Symposium On Vaccinium Culture	10.17660/ActaHortic.2006.715.78	Web Of Science
Robbins, Ps; Zhang, Aj; (...); Villani, Mg	Sex Pheromone Of The Cranberry Root Grub Lichnanthe Vulpina	2006	Journal Of Chemical Ecology	10.1007/s10886-006-9100-5	Web Of Science
Marchand, D , and Mcneil, Jn	Is Fruit Size Important In The Selection Of Oviposition Sites By Cranberry Fruitworm, Acrobasis Vaccinii?	2006	Entomologia Experimentalis Et Applicata	10.1111/j.1570-7458.2006.00424.x	Web Of Science
Wenninger, Ej , and Averill, Al	Mating Disruption Of Oriental Beetle (Coleoptera : Scarabaeidae) In Cranberry Using Retrievable, Point-Source Dispensers Of Sex Pheromone	2006	Environmental Entomology	10.1603/0046-225X-35.2.458	Web Of Science
Fitzpatrick, Sm	Delayed Mating Reduces Fecundity Of Blackheaded Fireworm, Rhopobota Naevana, On Cranberry	2006	Entomologia Experimentalis Et Applicata	10.1111/j.1570-7458.2006.00452.x	Web Of Science
Blake, G; Sandler, Ha; (...); Coggins, C	An Assessment Of Grower Perceptions And Factors Influencing Adoption Of Ipm In Commercial Cranberry Production	2007	Renewable Agriculture And Food Systems	10.1017/S1742170507001664	Web Of Science
Fitzpatrick, Sm	Survival Of Submerged Larvae Of Cranberry Girdler, Chrysoteuchia Topiaria, In The Laboratory	2007	Crop Protection	10.1016/j.cropro.2007.03.016	Web Of Science
Koppenhofer, Am; Rodriguez-Saona, Cr; (...); Holdcraft, Rj	Entomopathogenic Nematodes For Control Of Phyllophaga Georgiana (Coleoptera : Scarabaeidae) In Cranberries	2008	Biocontrol Science And Technology	10.1080/09583150701721705	Web Of Science
Cesar Rodriguez-Saona, Robert Holdcraft	Control Of Cranberry Blossomworm On Cranberries, 2006	2008	Arthropod Management Tests	10.1093/amt/33.1.L6	Arthropod Management Tests
Cesar Rodriguez-Saona, Robert Holdcraft	Control Of Blunt-Nosed Leafhopper Control On Cranberries, 2006	2008	Arthropod Management Tests	10.1093/amt/33.1.L5	Arthropod Management Tests
Cesar Rodriguez-Saona, Robert Holdcraft	Evaluation Of New Reduced-Risk Insecticides For Gypsy Moth, Sparganothis Fruitworm, And Spotted Fireworm Control In Cranberries, 2007	2009	Arthropod Management Tests	10.4182/amt.2009.C12	Arthropod Management Tests
Neto, Cc; Dao, Ca; (...); Houvel, Jev	Variation In Concentration Of Phenolic Acid Derivatives And Quercetin Glycosides In Foliage Of Cranberry That May Play A Role In Pest Deterrence	2010	Journal Of The American Society For Horticultural Science	10.21273/JASHS.135.6.494	Web Of Science
Rodriguez-Saona, C; Kaplan, I; (...); Williams, L	Field Responses Of Predaceous Arthropods To Methyl Salicylate: A Meta-Analysis And Case Study In Cranberries	2011	Biological Control	10.1016/j.biocontrol.2011.06.017	Web Of Science
Szendrei, Z; Averill, A; (...); Rodriguez-Saona, C	Identification And Field Evaluation Of Attractants For The Cranberry Weevil, Anthonomus Musculus Say	2011	Journal Of Chemical Ecology	10.1007/s10886-011-9938-z	Web Of Science
Cook, Ma; Ozeroff, Sn; (...); Roitberg, Bd	Host-Associated Differentiation In Reproductive Behaviour Of Cecidomyiid Midges On Cranberry And Blueberry	2011	Entomologia Experimentalis Et Applicata	10.1111/j.1570-7458.2011.01166.x	Web Of Science
Rodriguez-Saona, C; Vorsa, N; (...); Frost, Cj	Tracing The History Of Plant Traits Under Domestication In Cranberries: Potential Consequences On Anti-Herbivore Defences	2011	Journal Of Experimental Botany	10.1093/jxb/erq466	Web Of Science
Cesar Rodriguez-Saona, Dan Schiffhauer, Faruque U Zaman, Robert Holdcraft	Control Of Sparganothis Fruitworm In Cranberries, 2010	2011	Arthropod Management Tests	10.4182/amt.2011.C11	Arthropod Management Tests
Cesar Rodriguez-Saona, Robert Holdcraft, Vera Kyryczenko-Roth	Blunt-Nosed Leafhopper Control In Cranberries, 2009	2011	Arthropod Management Tests	10.4182/amt.2011.L4	Arthropod Management Tests
Cesar Rodriguez-Saona, Robert Holdcraft, Vera Kyryczenko-Roth	Spotted Fireworm Control In Cranberries, 2010	2011	Arthropod Management Tests	10.4182/amt.2011.L5	Arthropod Management Tests
Tewari, S; Buonaccorsi, Jp , and Averill, Al	Injury To Apical Meristem Of Cranberry By Dasineura Oxycoccana (Diptera: Cecidomyiidae) Reduces Production Of Floral-Units In The Next Growing Season	2012	Journal Of Economic Entomology	10.1603/EC11395	Web Of Science
Rodriguez-Saona, Cr; Byers, Ja , and Schiffhauer, D	Effect Of Trap Color And Height On Captures Of Blunt-Nosed And Sharp-Nosed Leafhoppers (Hemiptera: Cicadellidae) And Non-Target Arthropods In Cranberry Bogs	2012	Crop Protection	10.1016/j.cropro.2012.05.005	Web Of Science
Peach, Dah; Huber, Jt , and Fitzpatrick, Sm	Hymenopterous Parasitoids Of Cranberry Tipworm (Diptera: Cecidomyiidae) In British Columbia, Canada	2012	Canadian Entomologist	10.4039/tce.2012.37	Web Of Science
Miller, B; Bruck, Dj , and Walton, V	Relationship Of Black Vine Weevil Egg Density And Damage To Two Cranberry Cultivars	2012	Hortscience	10.21273/HORTSCI.47.6.755	Web Of Science
Cook, Ma; Fitzpatrick, Sm , and Roitberg, Bd	Phenology Of Dasineura Oxycoccana (Diptera: Cecidomyiidae) On Cranberry And Blueberry Indicates Potential For Gene Flow	2012	Journal Of Economic Entomology	10.1603/EC11418	Web Of Science
Tewari, S; Buonaccorsi, Jp , and Averill, Al	Impact Of Early Season Apical Meristem Injury By Gall Inducing Tipworm (Diptera: Cecidomyiidae) On Reproductive And Vegetative Growth Of Cranberry	2013	Journal Of Economic Entomology	10.1603/EC12269	Web Of Science
Fitzpatrick, Sm; Gries, R; (...); Gries, G	Populations Of The Gall Midge Dasineura Oxycoccana On Cranberry And Blueberry Produce And Respond To Different Sex Pheromones	2013	Journal Of Chemical Ecology	10.1007/s10886-012-0230-7	Web Of Science
Rodriguez-Saona, Cr; Polashock, J , and Malo, Ea	Jasmonate-Mediated Induced Volatiles In The American Cranberry, Vaccinium Macrocarpon: From Gene Expression To Organisrnal Interactions	2013	Frontiers In Plant Science	10.3389/fpls.2013.00115	Web Of Science
Steffan, Sa; Lee, Jc; (...); Patten, K	Susceptibility Of Cranberries To Drosophila Suzukii (Diptera: Drosophilidae)	2013	Journal Of Economic Entomology	10.1603/EC13331	Web Of Science
Deutsch, Ae; Rodriguez-Saona, Cr; (...); Steffan, Sa	Degree-Day Benchmarks For Sparganothis Sulfureana (Lepidoptera: Tortricidae) Development In Cranberries	2014	Journal Of Economic Entomology	10.1603/EC14261	Web Of Science
Medina, Rf; Szendrei, Z; (...); Rodriguez-Saona, C	Exploring Host-Associated Differentiation In The North American Native Cranberry Fruitworm, Acrobasis Vaccinii, From Blueberries And Cranberries	2014	Entomologia Experimentalis Et Applicata	10.1111/eea.12143	Web Of Science
Tewari, S; Buonaccorsi, Jp , and Averill, Al	Physiological Integration Plays Key Role In Cranberry (Ericales: Ericaceae) For Tolerance Of Damage By Dasineura Oxycoccana (Diptera: Cecidomyiidae)	2014	Environmental Entomology	10.1603/EN13231	Web Of Science
Deutsch, Ae; Rodriguez-Saona, Cr; (...); Steffan, Sa	Temperature-Mediated Development Thresholds Of Sparganothis Sulfureana (Lepidoptera: Tortricidae) In Cranberries	2015	Environmental Entomology	10.1093/ee/nvu062	Web Of Science
Christelle Guédot, R.S. Perry	Evaluation Of Foliar Insecticides For The Control Of Cranberry Fruitworm And Sparganothis Fruitworm In Cranberry, 2014	2015	Arthropod Management Tests	10.1093/amt/tsv017	Arthropod Management Tests
Christelle Guédot, R.S. Perry	Evaluation Of The Addition Of An Adjuvant On Foliar Insecticides For The Control Of Cranberry Fruitworm And Sparganothis Fruitworm In Cranberry, 2014	2015	Arthropod Management Tests	10.1093/amt/tsv018	Arthropod Management Tests
Christelle Guédot, R.S. Perry	Evaluation Of Soil And Foliar Applications Of Insecticides For The Control Of Flea Beetle In Cranberry, 2014	2015	Arthropod Management Tests	10.1093/amt/tsv019	Arthropod Management Tests
Christelle Guédot, R.S. Perry	Evaluation Of Foliar Insecticides For The Control Of Rhopobota Naevana In Cranberry, 2014	2015	Arthropod Management Tests	10.1093/amt/tsv016	Arthropod Management Tests
Christelle Guédot, R.S. Perry	Evaluation Of Foliar Insecticides For The Control Of Tipworm In Cranberry, 2014	2015	Arthropod Management Tests	10.1093/amt/tsv020	Arthropod Management Tests
Cesar Rodriguez-Saona, Dan Schiffhauer, Robert Holdcraft	Control Of Leafhoppers On Cranberries, 2011	2015	Arthropod Management Tests	10.4182/amt.2014.C10	Arthropod Management Tests
Cesar Rodriguez-Saona, Robert Holdcraft	Blunt-Nosed Leafhopper Control On Cranberries, 2013	2015	Arthropod Management Tests	10.4182/amt.2014.L8	Arthropod Management Tests
Cesar Rodriguez-Saona, Robert Holdcraft	Spotted Fireworm Control On Cranberries, 2013	2015	Arthropod Management Tests	10.4182/amt.2014.C9	Arthropod Management Tests
Rodriguez-Saona, C; Wanumen, Ac; (...); Kyryczenko-Roth, V	Toxicity Of Insecticides On Various Life Stages Of Two Tortricid Pests Of Cranberries And On A Non-Target Predator	2016	Insects	10.3390/insects7020015	Web Of Science
Chasen, Em , and Steffan, Sa	Temperature-Mediated Growth Thresholds Of Acrobasis Vaccinii (Lepidoptera: Pyralidae)	2016	Environmental Entomology	10.1093/ee/nvw053	Web Of Science
Christelle Guédot, R. S. Perry	Evaluation Of Foliar Insecticides And The Addition Of An Adjuvant For The Control Of Cranberry Fruitworm And Sparganothis Fruitworm In Cranberry, 2015	2016	Arthropod Management Tests	10.1093/amt/tsw126	Arthropod Management Tests
Christelle Guédot, R.S. Perry	Evaluation Of Foliar Insecticides For The Control Of Tipworm In Cranberry, 2015	2016	Arthropod Management Tests	10.1093/amt/tsw116	Arthropod Management Tests
Christelle Guédot, R.S. Perry	Evaluation Of Foliar Insecticides For The Control Of Rhopobota Naevana And Eupithecia Miserulata In Cranberry, 2015	2016	Arthropod Management Tests	10.1093/amt/tsw112	Arthropod Management Tests
Christelle Guédot, R.S. Perry	Evaluation Of The Addition Of An Adjuvant To Late Season Foliar Applications Of Insecticides For The Control Of Flea Beetle In Cranberry, 2015	2016	Arthropod Management Tests	10.1093/amt/tsw114	Arthropod Management Tests
Christelle Guédot, R.S. Perry	Evaluation Of Early Season Foliar Applications Of Insecticides For The Control Of Flea Beetle In Cranberry, 2015	2016	Arthropod Management Tests	10.1093/amt/tsw113	Arthropod Management Tests
Christelle Guédot, R.S. Perry	Evaluation Of Late Season Foliar Applications Of Insecticides For The Control Of Flea Beetle In Cranberry, 2015	2016	Arthropod Management Tests	10.1093/amt/tsw115	Arthropod Management Tests
Salamanca, J; Souza, B; (...); Rodriguez-Saona, C	From Laboratory To Field: Electro-Antennographic And Behavioral Responsiveness Of Two Insect Predators To Methyl Salicylate	2017	Chemoecology	10.1007/s00049-017-0230-8	Web Of Science
Mcmahan, Ee; Steffan, Sa , and Guedot, C	Population Densities Of Lepidopteran Pests In Selected Cranberry Cultivars In Wisconsin	2017	Journal Of Economic Entomology	10.1093/jee/tow274	Web Of Science
Steffan, Sa; Chasen, Em; (...); Mafra-Neto, A	Multi-Species Mating Disruption In Cranberries (Ericales: Ericaceae): Early Evidence Using A Flowable Emulsion	2017	Journal Of Insect Science	10.1093/jisesa/iex025	Web Of Science
Voing, K; Harrison, A , and Soby, Sd	Draft Genome Sequence Of Chromobacterium Subtsugae Mwu12-2387 Isolated From A Wild Cranberry Bog In Truro, Massachusetts	2017	Microbiology Resource Announcements	10.1128/genomeA.01633-16	Web Of Science
Tjiurutue, Mc; Sandler, Ha; (...); Adler, Ls	Gypsy Moth Herbivory Induced Volatiles And Reduced Parasite Attachment To Cranberry Hosts	2017	Oecologia	10.1007/s00442-017-3915-3	Web Of Science
Steffan, Sa; Singleton, Me; (...); Guedot, C	Flight Synchrony Among The Major Moth Pests Of Cranberries In The Upper Midwest, Usa	2017	Insects	10.3390/insects8010026	Web Of Science
Van Zoeren, J; Guedot, C , and Steffan, Sa	Conserving Carnivorous Arthropods: An Example From Early-Season Cranberry (Ericaceae) Flooding	2018	Canadian Entomologist	10.4039/tce.2017.66	Web Of Science
Mcmahan, Ee , and Guedot, C	Development Of Sparganothis Sulfureana (Lepidoptera: Tortricidae) On Cranberry Cultivars	2018	Insects	10.3390/insects9010004	Web Of Science
Ye, Wm; Foye, S; (...); Steffan, S	Incidence Of Oscheius Onirici ( Nematoda: Rhabditidae), A Potentially Entomopathogenic Nematode From The Marshlands Of Wisconsin, Usa	2018	Journal Of Nematology	10.21307/jofnem-2018-004	Web Of Science
Fitzpatrick, Sm; Wong, Whl; (...); Craig, Ln	A Bucket-Type Emergence Trap For Detecting Overwintered Dasineura Oxycoccana (Diptera: Cecidomyiidae) And Its Parasitoids In Cranberry	2018	Florida Entomologist	10.1653/024.101.0410	Web Of Science
Cesar Rodriguez-Saona, Robert Holdcraft	Blunt-Nosed Leafhopper Control In Cranberries, 2014	2018	Arthropod Management Tests	10.1093/amt/tsy058	Arthropod Management Tests
De Lange, Es; Kyryczenko-Roth, V; (...); Rodriguez-Saona, C	Increased Nutrient Availability Decreases Insect Resistance In Cranberry	2019	Agricultural And Forest Entomology	10.1111/afe.12335	Web Of Science
Pradit, N; Mescher, Mc; (...); Rodriguez-Saona, C	Phytoplasma Infection Of Cranberries Benefits Non-Vector Phytophagous Insects	2019	Frontiers In Ecology And Evolution	10.3389/fevo.2019.00181	Web Of Science
De Lange, Es; Salamanca, J; (...); Rodriguez-Saona, C	Genotypic Variation And Phenotypic Plasticity In Gene Expression And Emissions Of Herbivore-Induced Volatiles, And Their Potential Tritrophic Implications, In Cranberries	2019	Journal Of Chemical Ecology	10.1007/s10886-018-1043-0	Web Of Science
Foye, S , and Steffan, S	Two Native Wisconsin Nematodes Represent Virulent Biocontrol Agents In Cranberries	2019	Biological Control	10.1016/j.biocontrol.2019.104042	Web Of Science
Salamanca, J; Souza, B; (...); Rodriguez-Saona, C	Methyl Salicylate Increases Attraction And Function Of Beneficial Arthropods In Cranberries	2019	Insects	10.3390/insects10120423	Web Of Science
Drolet, I; Guay, Jf; (...); Cloutier, C	Biodiversity Of Lepidopteran Pests And Their Parasitoids In Organic And Conventional Cranberry Crop	2019	Biological Control	10.1016/j.biocontrol.2018.11.003	Web Of Science
Cesar Rodriguez-Saona, Robert Holdcraft, Vera Kyryczenko-Roth	Blunt-Nosed Leafhopper Control On Cranberries, 2018	2019	Arthropod Management Tests	10.1093/amt/tsz009	Arthropod Management Tests
Rodriguez-Saona, C; Urbaneja-Bernat, P; (...); Garzon-Tovar, V	Interactive Effects Of An Herbivore-Induced Plant Volatile And Color On An Insect Community In Cranberry	2020	Insects	10.3390/insects11080524	Web Of Science
Rodriguez-Saona, C; Kyryczenko-Roth, V; (...); Firbas, N	Characterizing The Feeding Injury Caused By Phylloscelis Rubra (Hemiptera: Dictyopharidae) To Cranberries	2020	Journal Of Insect Science	10.1093/jisesa/ieaa143	Web Of Science
Pradit, N; Mescher, Mc; (...); Rodriguez-Saona, C	Phytoplasma Infection Of Cranberry Affects Development And Oviposition, But Not Host-Plant Selection, Of The Insect Vectorlimotettix Vaccinii	2020	Journal Of Chemical Ecology	10.1007/s10886-019-01137-6	Web Of Science
Rodriguez-Saona, C; Alborn, Ht; (...); Averill, Al	Fine-Tuning The Composition Of The Cranberry Weevil (Coleoptera: Curculionidae) Aggregation Pheromone	2020	Journal Of Applied Entomology	10.1111/jen.12752	Web Of Science
Labarre, D; Piche-Luneau, S; (...); Lucas, E	Fruit Damages Caused By The Broad-Winged Bush Katydid,Scudderia Pistillata(Orthoptera: Tettigoniidae) In Commercial Cranberry Bog	2020	Journal Of Applied Entomology	10.1111/jen.12817	Web Of Science
Cesar Rodriguez-Saona, Robert Holdcraft	Cranberry Toad Bug Control On Cranberries, 2016–2017	2020	Arthropod Management Tests	10.1093/amt/tsaa105	Arthropod Management Tests
Cesar Rodriguez-Saona, Robert Holdcraft	Cranberry Toad Bug Control On Cranberries, 2014	2020	Arthropod Management Tests	10.1093/amt/tsaa047	Arthropod Management Tests
Luck, BD; Chasen, EM; (...); Steffan, SA	Drones That Deliver: Pheromone-Based Mating Disruption Deployed Via Uncrewed Aerial Vehicles In Us Cranberries	2021	Journal Of Economic Entomology	10.1093/jee/toab068	Web Of Science
Rodriguez-Saona, C; Polashock, JJ; (...); Mescher, MC	Application Of Plant Defense Elicitors Fails To Enhance Herbivore Resistance Or Mitigate Phytoplasma Infection In Cranberries	2021	Frontiers In Plant Science	10.3389/fpls.2021.700242	Web Of Science
Jaffe, BD; Rink, S , and Guedot, C	Life History And Damage By Systena Frontalis F. (Coleoptera: Chrysomelidae) On Vaccinium Macrocarpon Ait.	2021	Journal Of Insect Science	10.1093/jisesa/ieab004	Web Of Science
Jaffe, BD; Wallin, M; (...); Guedot, C	Cranberry (Vaccinium Macrocarpon) Is A Marginal Host For Brown Marmorated Stink Bug	2021	Journal Of Economic Entomology	10.1093/jee/toab032	Web Of Science
